# Supplementary material for: Synthesis, SAR, and Docking Studies Disclose 2-Arylfuran-1,4-naphthoquinones as In Vitro Antiplasmodial Hits
Source: Hindawi journal article supplement (doi:10.1155/2017/7496934), 2017-01-01
Supplement: f1 [file 7496934.f1.pdf]

## Supplementary Information

### (*E*)-2-(4-chlorostyryl)-3-hydroxynaphthalene-1,4-dione (**6h**)

Yield: 91%; red solid; MP: 195.5-195.9 °C; IR  $\text{cm}^{-1}$ : 3254 (O-H), 2956 ( $\text{C-H}_{\text{aromatic}}$ ), 1664 and 1645 (C=O), 1274 (C-O), 723 (C-Cl);  $^1\text{H}$ - NMR (400 MHz,  $\text{CDCl}_3$ )  $\delta$ : 8.16 (dd, 1H,  $J_{5,6}$  = 7.66 Hz,  $J_{5,7}$  = 0.70 Hz, H-5), 8.11 (dd, 1H,  $J_{8,7}$  = 8.11 Hz,  $J_{8,6}$  = 0.84 Hz, H-8), 7.78 (t, 1H,  $J_{6,7}$  and  $6,5$  = 7.58 Hz, H-6), 7.71 (t, 1H,  $J_{7,6}$  and  $7,8$  = 7.58 Hz, H-7), 7.99 (s, 1H, OH), 7.38-7.34 (m, 3H, H-1' and H-5'), 7.94 (d, 1H,  $J_{2',1'}$  = 16.68 Hz, H-2'), 7.53 (d, 2H,  $J_{5',4'}$  = 8.44 Hz, H-4');  $^{13}\text{C}$ - NMR (100 MHz,  $\text{CDCl}_3$ )  $\delta$ : 181.36 (C-1), 152.26 (C-2), 118.65 (C-3), 184.31 (C-4), 127.45 (C-5), 135.34 (C-6), 133.50 (C-7), 126.39 (C-8), 129.81 (C-9), 132.99 (C-10), 118.24 (C-1'), 138.04 (C-2'), 136.59 (C-3'), 128.40 (C-4'), 129.15 (C-5'), 134.59 (C-6'); HRMS-ESI ( $m/z$ ):  $[\text{M-H}^+]$  calcd for  $\text{C}_{18}\text{H}_{12}\text{O}_3$ : 275.0708, found: 275.0677, error 11 ppm.

### 2-Phenylnaphtho[1,2-*b*]furan-4,5-dione (**7g**)

Yield: 30 %; red solid; MP: 214.5-217.0 °C; IR  $\text{cm}^{-1}$ : 3069 ( $\text{C-H}_{\text{aromatic}}$ ), 2921 (C-H), 1668 (C=O);  $^1\text{H}$ - NMR (400 MHz,  $\text{CDCl}_3$ )  $\delta$ : 7.73-7.41 (m, 2H, H-5 and H-6), 7.67 (t, 1H,  $J_{7,8}$  and  $7,6$  = 7.50 Hz, H-7), 8.06 (d, 1H,  $J_{8,7}$  = 7.68 Hz, H-8), 7.01 (s, 1H, H-1'), 7.48-7.36 (m, 4H, H-4' and H-5'), 7.78-7.77 (m, 1H, H-6');  $^{13}\text{C}$ - NMR (100 MHz,  $\text{CDCl}_3$ )  $\delta$ : 180.55 (C-1), 174.62 (C-2), 123.51 (C-3), 156.94 (C-4), 122.41 (C-5), 135.63 (C-6), 129.42 (C-7), 130.39 (C-8), 129.08 (C-9), 128.84 (C-10), 103.02 (C-1'), 159.91 (C-2'), 128.63 (C-3'), 129.21 (C-4'), 124.61 (C-5'), 130.80 (C-6').

### 2-(4-Chlorophenyl)naphtho[1,2-*b*]furan-4,5-dione (**7h**)

Yield: 20%; red solid; MP: 284.1-284.8.0 °C; IR  $\text{cm}^{-1}$ : 3245 (C-H<sub>aromatic</sub>), 2921 (C-H), 1704 and 1668 (C=O); <sup>1</sup>H- NMR (400 MHz, CDCl<sub>3</sub>)  $\delta$ : 8.11 (d, 1H,  $J_{8,7}$ =7.68 Hz, H-8), 7.81 (d, 1H,  $J_{5,6}$ =7.60 Hz, H-5), 7.71 (s, 1H, H-7), 7.49 (t, 1H,  $J_{6,7}$  and  $J_{5,6}$ =7.72 Hz, H-6), 7.05 (s, 1H, H-1'), 7.69-7.67 (m, 2H, H-4'), 7.48-7.44 (m, 2H, H-5'); <sup>13</sup>C- NMR (100 MHz, CDCl<sub>3</sub>)  $\delta$ : 180.57 (C-1), 174.64 (C-2), 123.56 (C-3), 155.91 (C-4), 122.51 (C-5), 135.45 (C-6), 130.61 (C-7), 130.97 (C-8), 129.57 (C-9), 128.55 (C-10), 103.66 (C-1'), 160.16 (C-2'), 125.93 (C-3'), 125.71 (C-4'), 129.35 (C-5'), 135.70 (C-6').

2-(4-Chlorophenyl)naphtho[2,3-*b*]furan-4,9-dione (**8h**)

Yield: 30% ; orange solid; MP: 255.8-258.7 °C; IR  $\text{cm}^{-1}$ : 3113 (C-H<sub>aromatic</sub>), 2922 (C-H), 1665 (C=O); <sup>1</sup>H- NMR (400 MHz, CDCl<sub>3</sub>)  $\delta$ : 8.12 (d, 1H,  $J_{8,7}$ =7.62 Hz, H-8), 7.91 (d, 1H,  $J_{5,6}$ =7.64 Hz, H-5), 7.72 (s, 1H, H-7), 7.60 (t, 1H,  $J_{6,7}$  and  $J_{5,6}$ =7.72 Hz, H-6), 7.06 (s, 1H, H-1'), 7.70-7.68 (m, 2H, H-4'), 7.49-7.44 (m, 2H, H-5'); <sup>13</sup>C- NMR (100 MHz, CDCl<sub>3</sub>)  $\delta$ : 181.57 (C-1), 172.64 (C-2), 123.54 (C-3), 155.81 (C-4), 122.71 (C-5), 135.45 (C-6), 130.61 (C-7), 130.97 (C-8), 129.57 (C-9), 128.55 (C-10), 103.66 (C-1'), 160.17 (C-2'), 125.89 (C-3'), 125.71 (C-4'), 129.34 (C-5'), 135.69 (C-6').

2-(Oxiran-2-ylmethoxy)naphthalene-1,4-dione (**9**)

Yield: 58 %; yellow solid; MP: 97-100 °C; IR  $\text{cm}^{-1}$ : 2973 (C-H<sub>aromatic</sub>), 1651 (C=O), 1115 (C-O<sub>alcohol</sub>), 1198 (C-O<sub>epoxide</sub>), 1098 (C-O<sub>ether</sub>); <sup>1</sup>H- NMR (400 MHz, CDCl<sub>3</sub>)  $\delta$ : 7.70 (d, 1H,  $J_{8,7}$ = 7.40 Hz, H-8), 7.62 (t, 1H,  $J_{6,7}$  and  $J_{5,6}$ = 7.20 Hz, H-6), 8.08 (d, 1H,  $J_{5,6}$ = 7.52 Hz, H-5), 7.53 (t, 1H,  $J_{7,8}$  and  $J_{6,7}$ = 7.20 Hz, H-7), 5.74 (s, 1H, H-3), 4.92 (bs, 1H, H-12), 4.50 (d, 1H,  $J_{11a,11b}$ = 11.50 Hz, H-11a), 4.24 (d, 1H,  $J_{11b,11a}$ = 11.50 Hz, H-11b), 4.41 (d, 1H,  $J_{13a,13b}$ = 6.64 Hz, H-13a), 4.30-4.27 (m, 1H, H-13b); <sup>13</sup>C- NMR (100 MHz, CDCl<sub>3</sub>)  $\delta$ : 184.52 (C-1), 106.32 (C-2), 96.84 (C-3), 165.78 (C-4), 130.44

(C-5), 132.80 (C-6), 126.15 (C-7), 126.29 (C-8), 135.03 (C-9), 132.86 (C-10), 74.47 (C-11), 72.47 (C-12), 68.14 (C-13); HRMS-ESI (m/z):  $[M+Na]^+$  calcd for  $C_{13}H_{10}O_4$ : 253.0477, found: 253.0482, error 2ppm.

2-(3-(Ethylamino)-2-hydroxypropoxy)naphthalene-1,4-dione (**10a**)

Yield: 30 %; white solid; MP: 209.9-210.6 °C; IR  $cm^{-1}$ : 3225 (OH); 3057 (NH); 2943 (C-H<sub>aromatic</sub>), 1598 (C=O), 1117 (C-O<sub>alcohol</sub>), 1093 (C-O<sub>ether</sub>); <sup>1</sup>H- NMR (400 MHz, CDCl<sub>3</sub>)  $\delta$ : 7.86-7.84 (m, 2H, H-8 and H-5), 7.49-7.54 (m, 2H, H-6 and H-7), 5.16 (s, 1H, H-3), 3.98-3.94 (t, m, H-13a), 4.15 (t, 1H,  $J_{11b,11a}$  and  $11b,12$  = 8.12 Hz, H-11b), 4.79 (t, 1H,  $J_{12,11a}$  and  $12,11b$  = 7.30, H-12), 3.67 (dd, 1H,  $J_{13b,NH}$  = 3.04 Hz and  $J_{13b,13a}$  = 12.20 Hz, H-13b), 3.09 (t, 2H,  $J_{14,15}$  = 6.72 Hz, H-14), 1.19 (t, 2H,  $J_{15,14}$  = 7.24, Hz, H-15); <sup>13</sup>C- NMR (100 MHz, CDCl<sub>3</sub>)  $\delta$ : 179.96 (C-1), 101.01 (C-2), 94.29 (C-3), 161.38 (C-4), 128.95 (C-5), 131.15 (C-6), 124.76 (C-7), 125.04 (C-8), 140.00 (C-9), 131.60 (C-10), 64.88 (C-11), 79.66 (C-12), 58.5 (C-13), 37.08 (C-14), 12.98 (C-15); HRMS-ESI (m/z):  $[M-CH_2CH_3]^+$  calcd for  $C_{17}H_{21}NO_4$ : 274.1080, found: 274.1000, error 29 ppm.

2-(2-Hydroxy-3-(isopropylamino)propoxy)naphthalene-1,4-dione (**10b**)

Yield: 20 %; white solid; MP: 242-244 °C; IR  $cm^{-1}$ : 3224 (OH); 3062 (NH); 2980 (C-H<sub>aromatic</sub>), 1600 (C=O), 1117 (C-O<sub>alcohol</sub>), 1093 (C-O<sub>ether</sub>); <sup>1</sup>H- NMR (400 MHz, CDCl<sub>3</sub>)  $\delta$ : 7.87-7.84 (m, 1H, H-8), 7.91-7.89 (m, 1H, H-5), 7.54 (d, 2H,  $J_{6,7-6,5}$  and  $7,8-7,6$  = 7.60 Hz, H-7 and H-6), 4.02-3.98 (m, 1H, H-13a), 3.68 (dd, 1H,  $J_{13b,13a}$  = 12.08 Hz,  $J_{13b,NH}$  = 33.72 Hz, H-13b), 4.79 (t, 1H,  $J_{12,11a}$  and  $12,13b$  = 7.26, H-12), 4.26 (t, 1H,  $J_{11a,12}$  and  $11a,11b$  = 7.44 Hz, H-11a), 4.14 (t, 1H,  $J_{11b,12}$  and  $11b,11a$  = 8.22 Hz, H-11b), 3.64-3.59 (m, 1H, H-14), 1.17 (d, 3H,  $J_{15,14}$  = 6.44 Hz, H-15), 1.15 (d, 3H,  $J_{16,14}$  = 6.44 Hz, H-16); <sup>13</sup>C- NMR (100 MHz, CDCl<sub>3</sub>)  $\delta$ : 179.92 (C-1), 101.00 (C-2), 94.21 (C-3),

160.51 (C-4), 128.92 (C-5), 131.07 (C-6), 124.70 (C-7), 124.93 (C-8), 139.95 (C-9), 131.68 (C-10), 64.88 (C-11), 79.88 (C-12), 58.96 (C-13), 43.45 (C-14), 21.40 (C-15), 21.24 (C-16); HRMS-ESI (m/z):  $[M+H]^+$  calcd for  $C_{16}H_{19}NO_4$ : 290.1392, found: 290.1396, error 1.37 ppm.

**2-(3-(Benzylamino)-2-hydroxypropoxy)naphthalene-1,4-dione (**10c**)**

Yield: 25 %; white solid; MP: 180.20-181.70 °C; IR  $cm^{-1}$ : 3225 (OH); 3057 (NH); 2943 (C-H<sub>aromatic</sub>), 1598 (C=O), 1119 (C-O alcohol), 1151 (C-O ether);  $^1H$ - NMR (400 MHz,  $CDCl_3$ )  $\delta$ :  $^1H$ - NMR (400 MHz,  $CDCl_3$ )  $\delta$ : 7.83 (d, 1H,  $J_{8,7}$  = 8.00 Hz, H-8), 8.29 (s, 1H, H-5), 7.58-7.53 (m, 1H, H-6), 7.47 (t, 1H,  $J_{7,6}$  and  $7,8$  = 7.00 Hz, H-7), 5.17 (s, 1H, H-3), 4.40-4.38 (m, 3H, H-11a and H-14), 3.69 (d, 1H,  $J_{13b,13a}$  = 12.04 Hz, H-13b), 4.77 (t, 1H,  $J_{12,11a}$  and  $12,11b$  = 7.44 Hz, H-12), 4.23 (t, 1H,  $J_{11b,11a}$  = 8.00, H-13b), 7.35-7.34 (m, 5H, H-16-18);  $^{13}C$ - NMR (100 MHz,  $CDCl_3$ )  $\delta$ : 180.13 (C-1), 101.31 (C-2), 95.50 (C-3), 161.20 (C-4), 128.91 (C-5), 131.17 (C-6), 124.80 (C-7), 124.86 (C-8), 140.06 (C-9), 131.39 (C-10), 65.10 (C-11), 79.39 (C-12), 59.71 (C-13), 45.35 (C-14), 137.44 (C-15), 126.97 (C-16), 128.48 (C-17), 127.07 (C-18); HRMS-ESI.

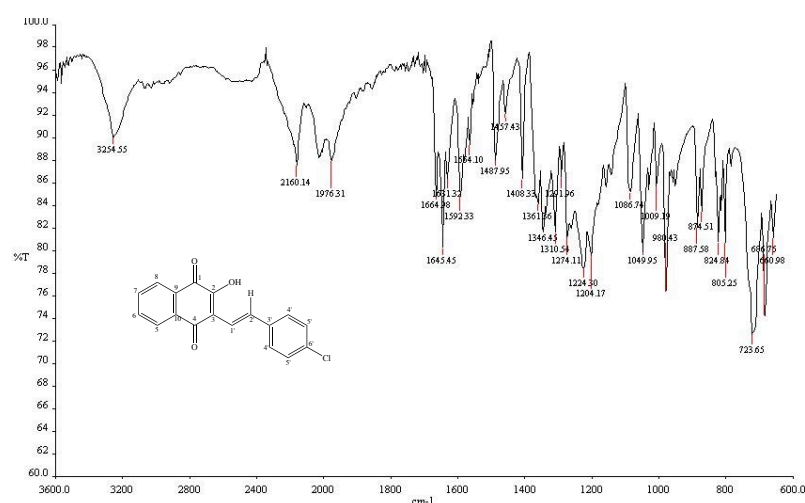

**Figure S1:** IR (ATR) spectrum of (*E*)-2-(4-chlorostyryl)-3-hydroxynaphthalene-1,4-dione (**6h**).

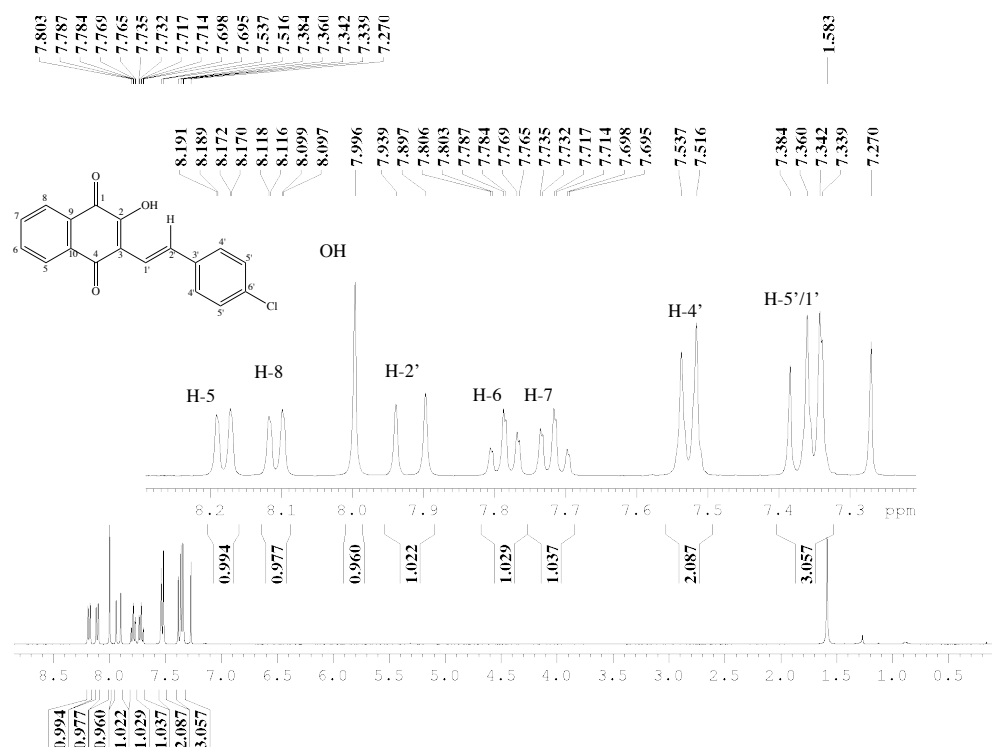

**Figure S2:** <sup>1</sup>H NMR spectrum (400 MHz, CDCl<sub>3</sub>) of (*E*)-2-(4-chlorostyryl)-3-hydroxynaphthalene-1,4-dione (**6h**).

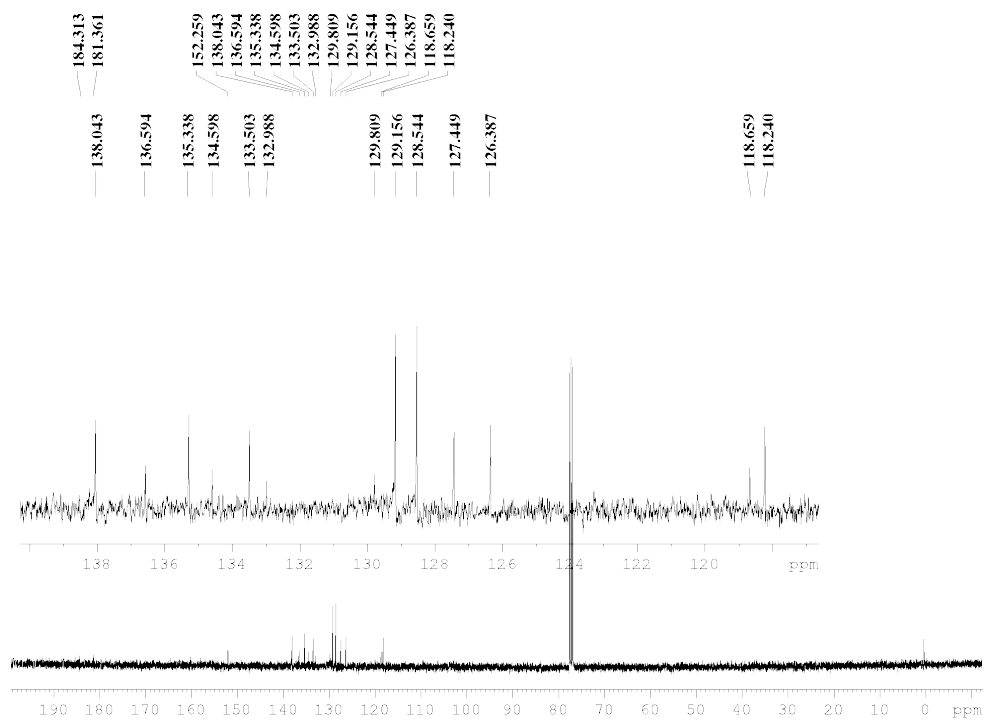

**Figure S3:** <sup>13</sup>C NMR spectrum (100 MHz, CDCl<sub>3</sub>) and DEP 135 of (*E*)-2-(4-chlorostyryl)-3-hydroxynaphthalene-1,4-dione (**6h**).

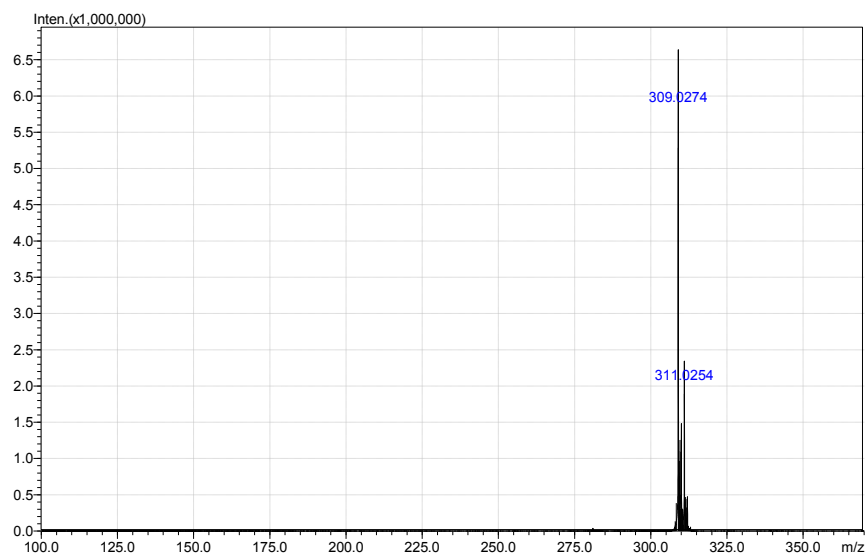

**Figure S4:** HRMS spectrum of of (*E*)-2-(4-chlorostyryl)-3-hydroxynaphthalene-1,4-dione (**6h**).

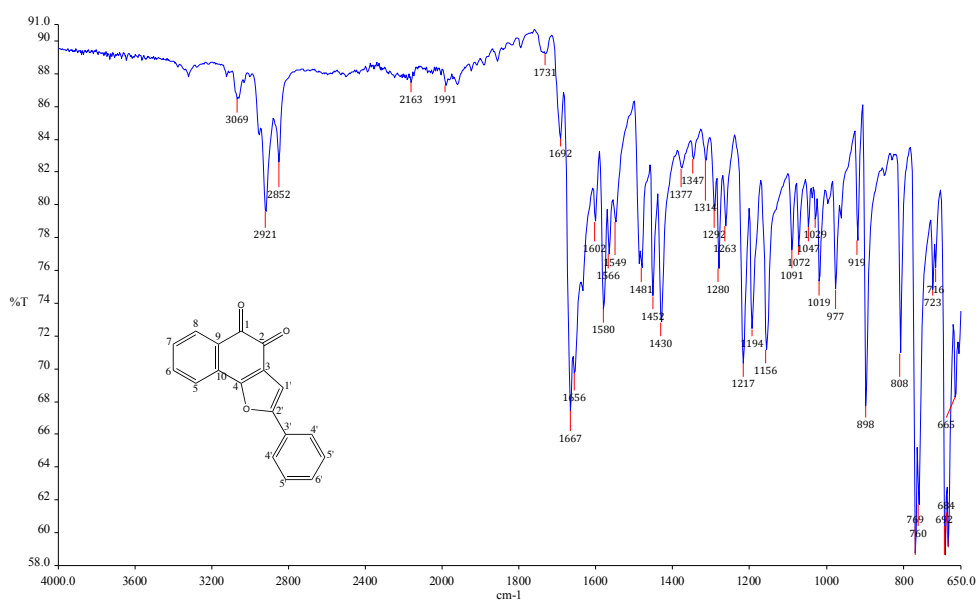

**Figure S5:** <sup>1</sup>H NMR spectrum (400 MHz, CDCl<sub>3</sub>) of 2-phenylnaphtho[1,2-*b*]furan-4,5-dione (**7g**).

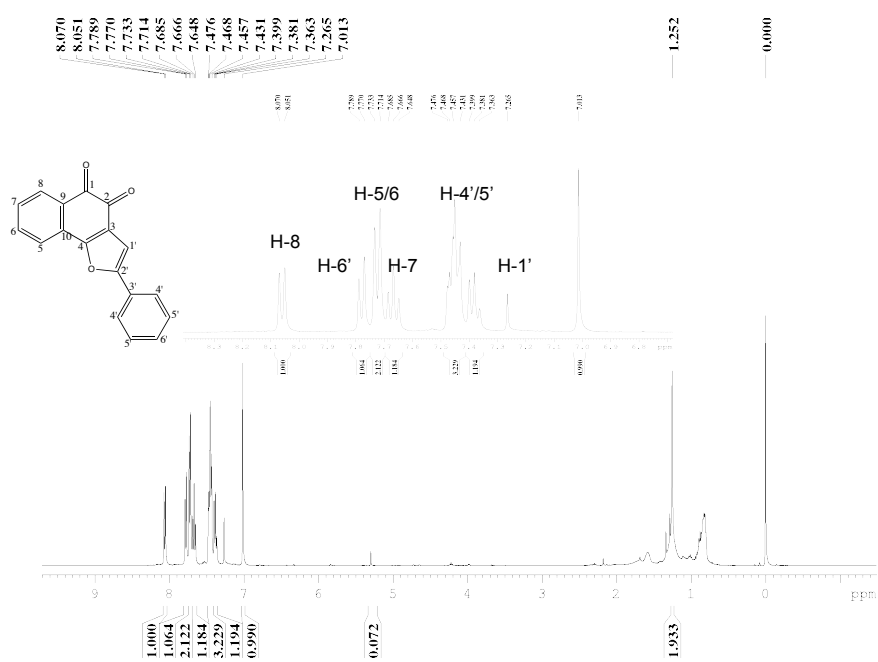

**Figure S6:** <sup>1</sup>H NMR spectrum (400 MHz, CDCl<sub>3</sub>) of 2-phenylnaphtho[1,2-*b*]furan-4,5-dione (**7g**).

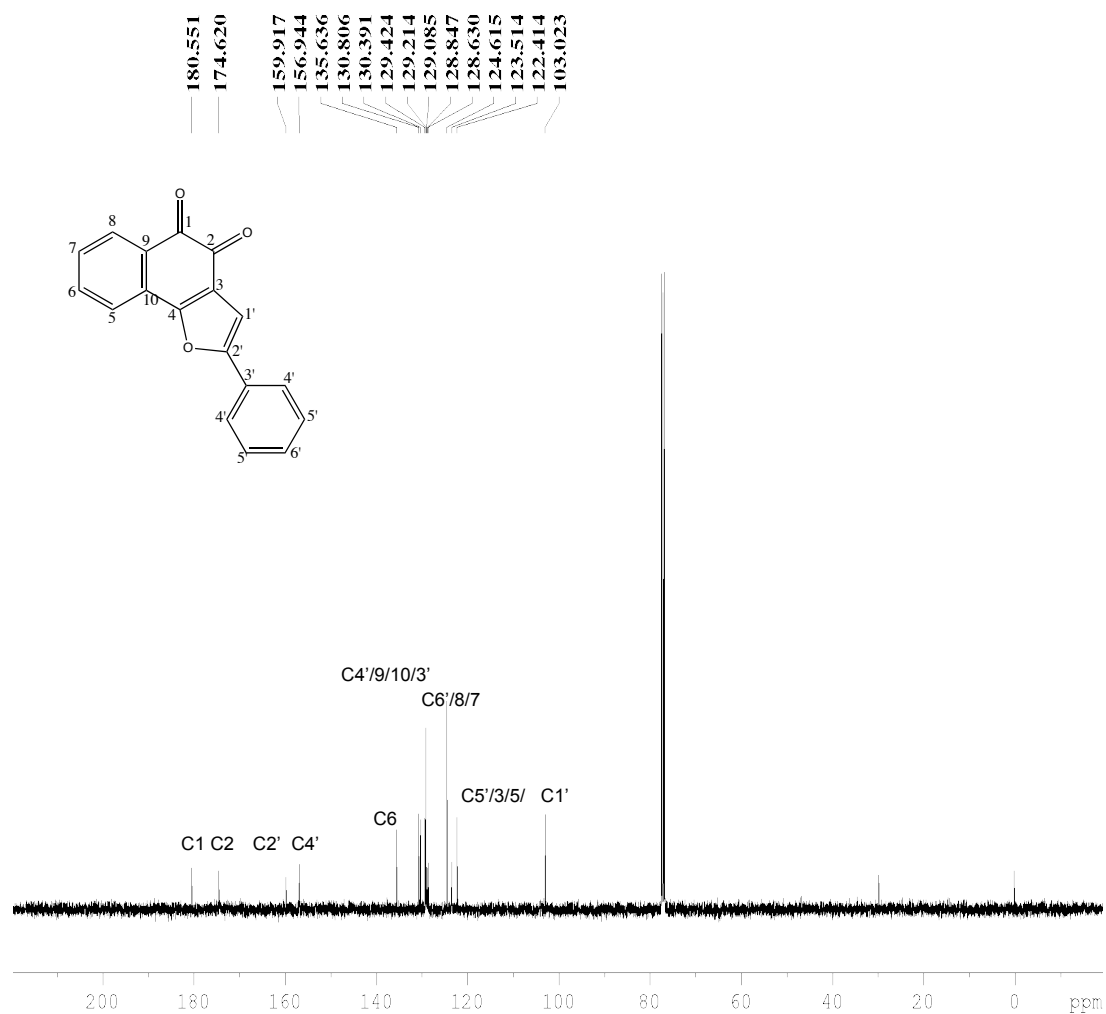

**Figure S7:**  $^{13}\text{C}$  NMR spectrum (100 MHz,  $\text{CDCl}_3$ ) of 2-phenylnaphtho[1,2-*b*]furan-4,5-dione (**7g**).



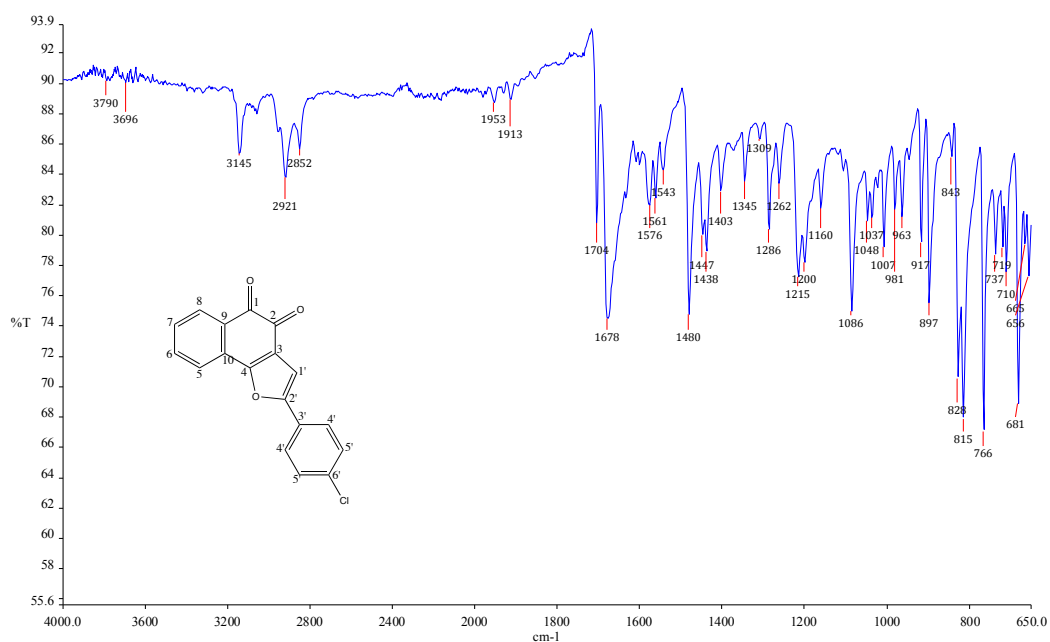

**Figure S8:** IR (ATR) spectrum of 2-(4-chlorophenyl)naphtho[1,2-*b*]furan-4,5-dione (**7h**).

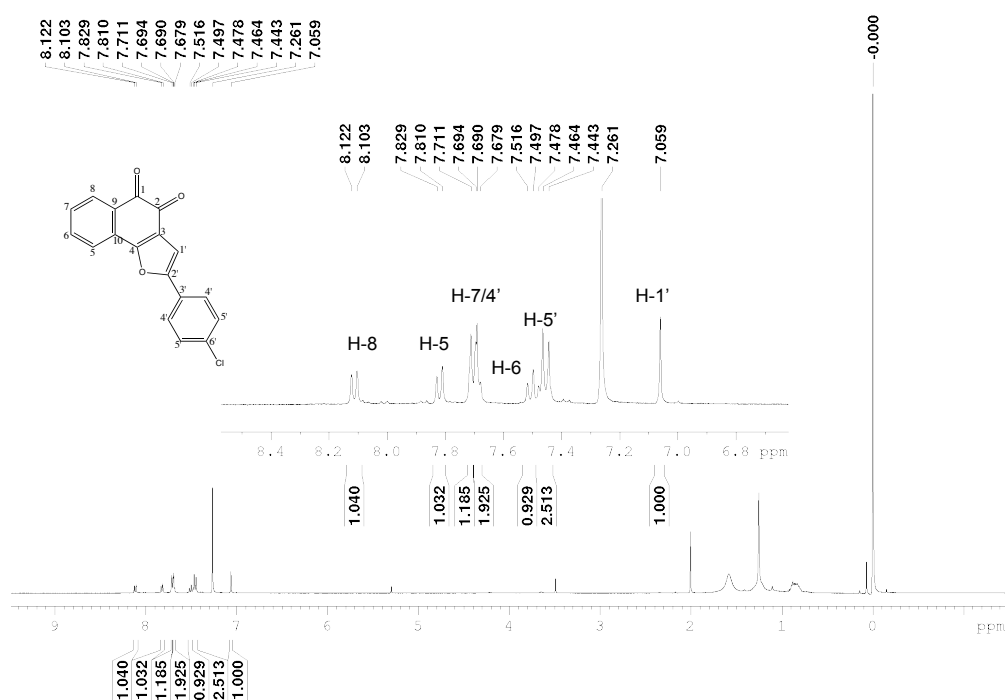

**Figure S9:** <sup>1</sup>H NMR spectrum (400 MHz, CDCl<sub>3</sub>) of 2-(4-chlorophenyl)naphtho[1,2-*b*]furan-4,5-dione (**7h**).

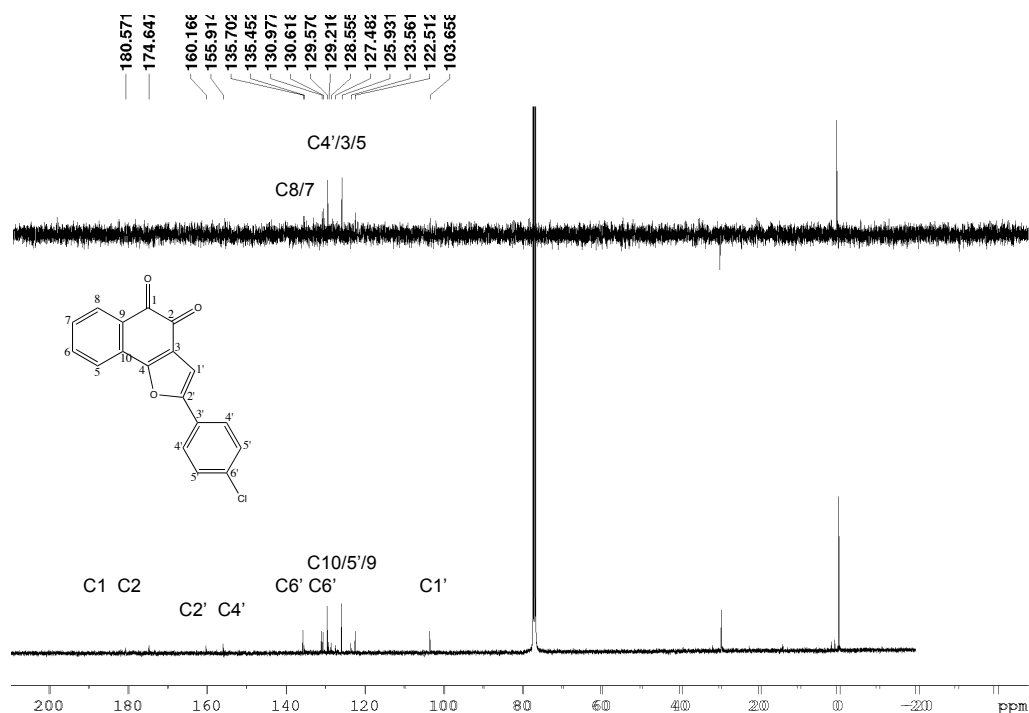

**Figure S10:**  $^{13}\text{C}$  NMR spectrum (100 MHz,  $\text{CDCl}_3$ ) and DEPT 135 of 2-(4-chlorophenyl)naphtho[1,2-*b*]furan-4,5-dione (**7h**).

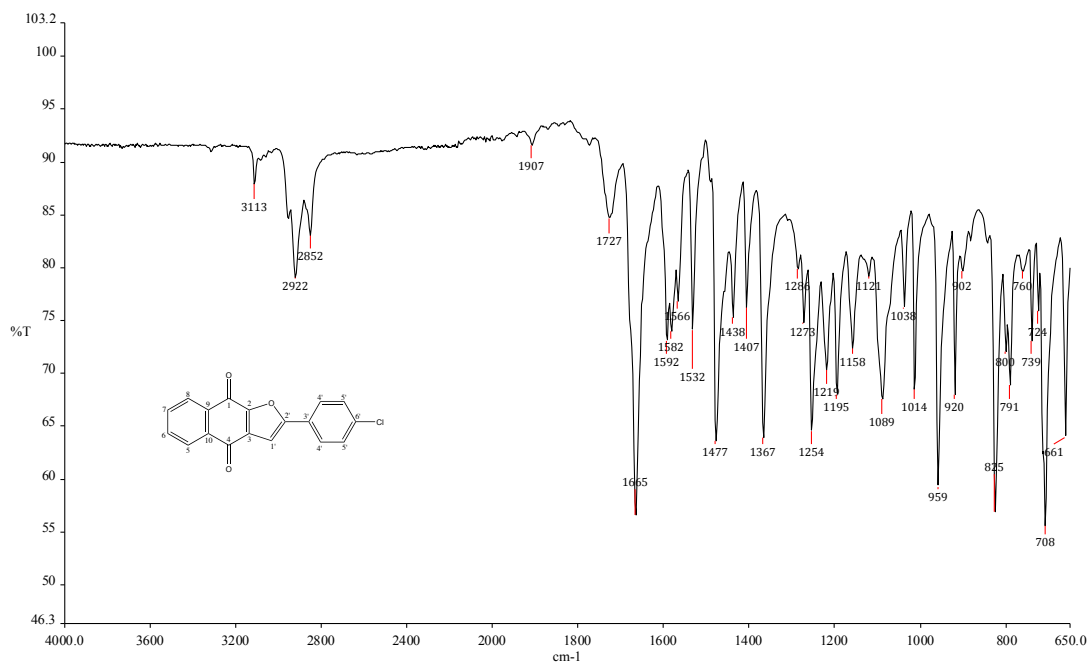

**Figure S11:** IR (ATR) spectrum of 2-(4-chlorophenyl)naphtho[2,3-*b*]furan-4,9-dione (**8h**).



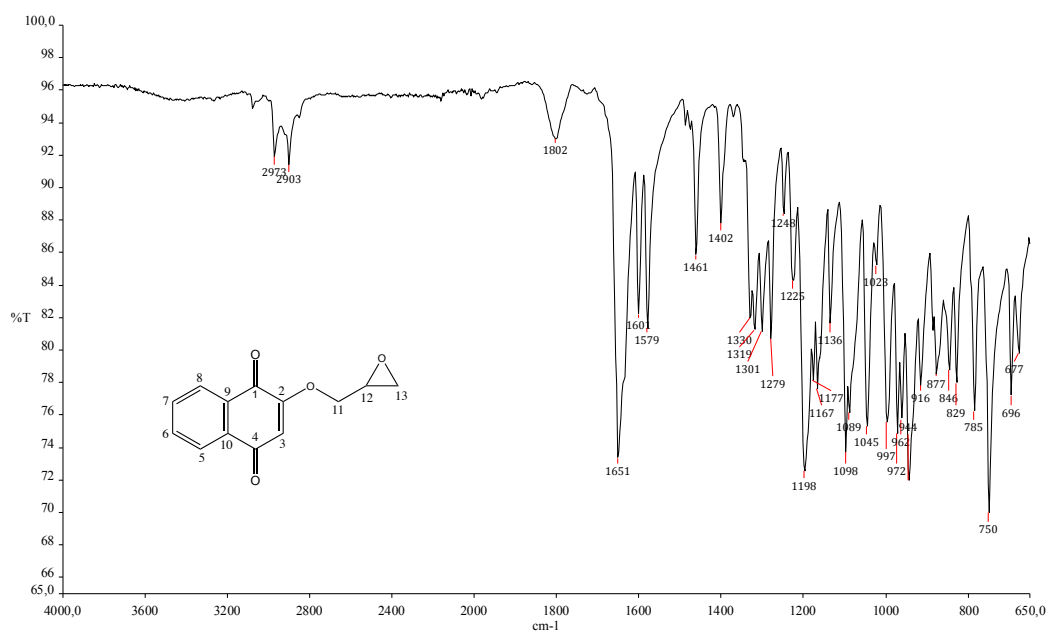

**Figure S14:** IR (ATR) spectrum of 2-(oxiran-2-ylmethoxy)naphthalene-1,4-dione (**9**).

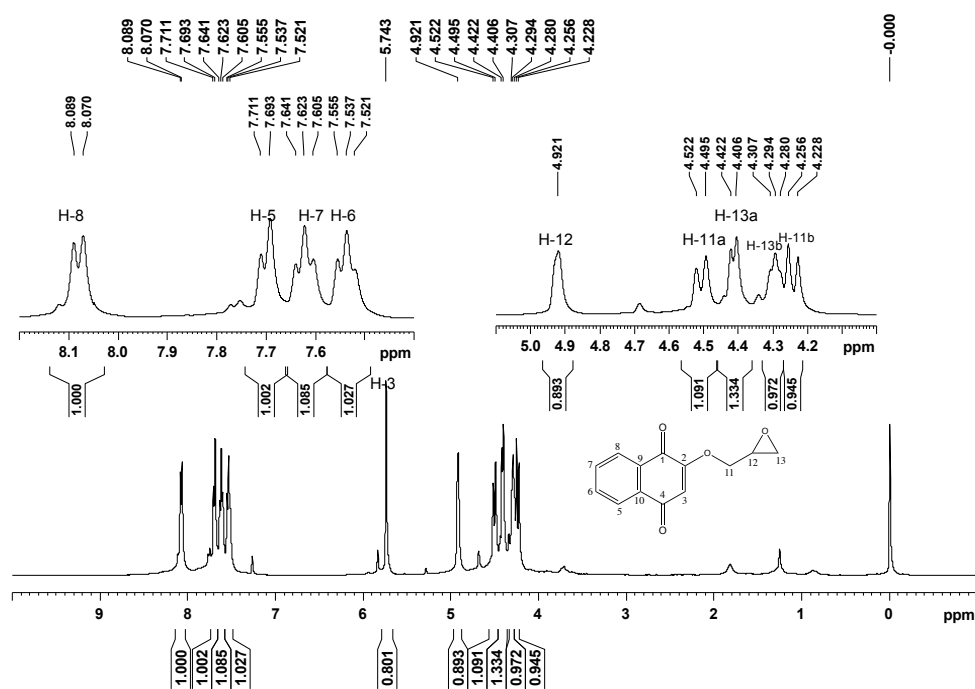

**Figure S15:**  $^1\text{H}$  NMR spectrum (400 MHz,  $\text{DMSO-d}_6$ ) of 2-(oxiran-2-ylmethoxy)naphthalene-1,4-dione (**9**).

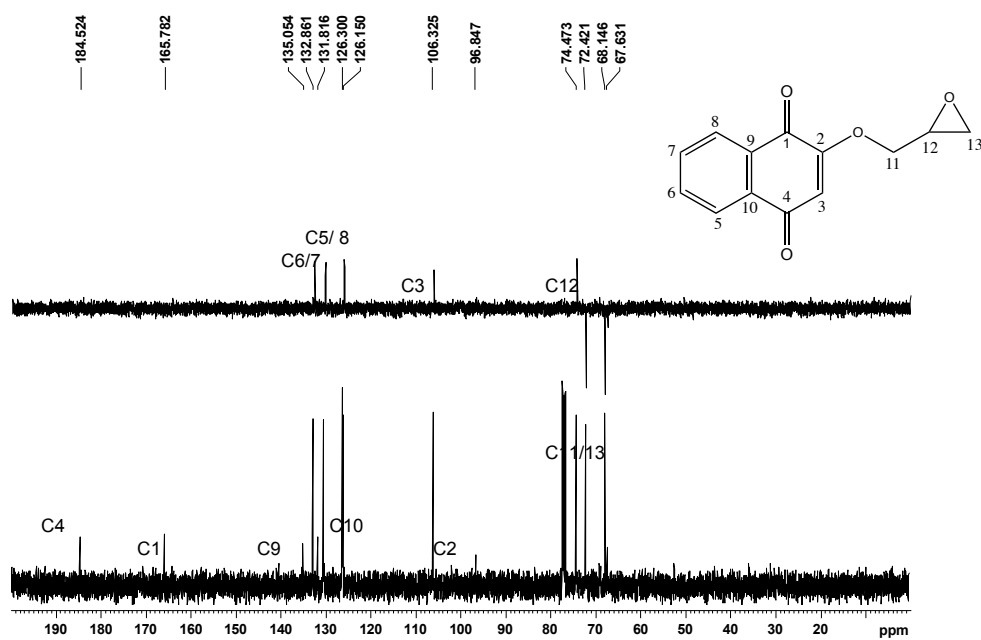

**Figure S16:**  $^{13}\text{C}$  NMR spectrum (100 MHz, DMSO-d<sub>6</sub>) and DEPT 135 of 2-(oxiran-2-ylmethoxy)naphthalene-1,4-dione (**9**).

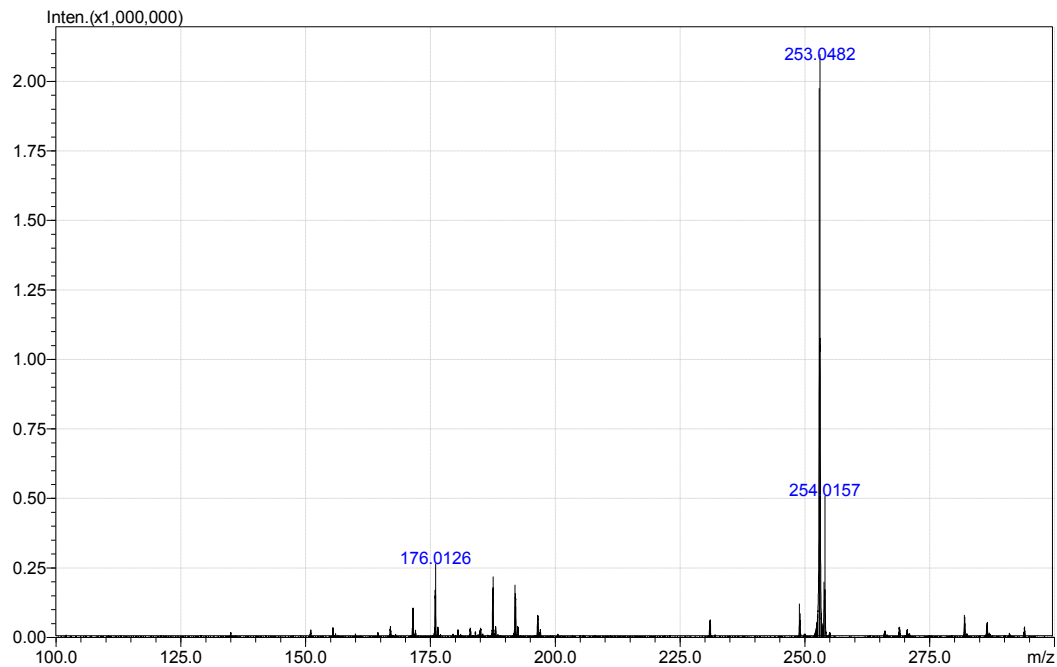

**Figure S17:** HRMS spectrum of 2-(oxiran-2-ylmethoxy)naphthalene-1,4-dione (**9**).

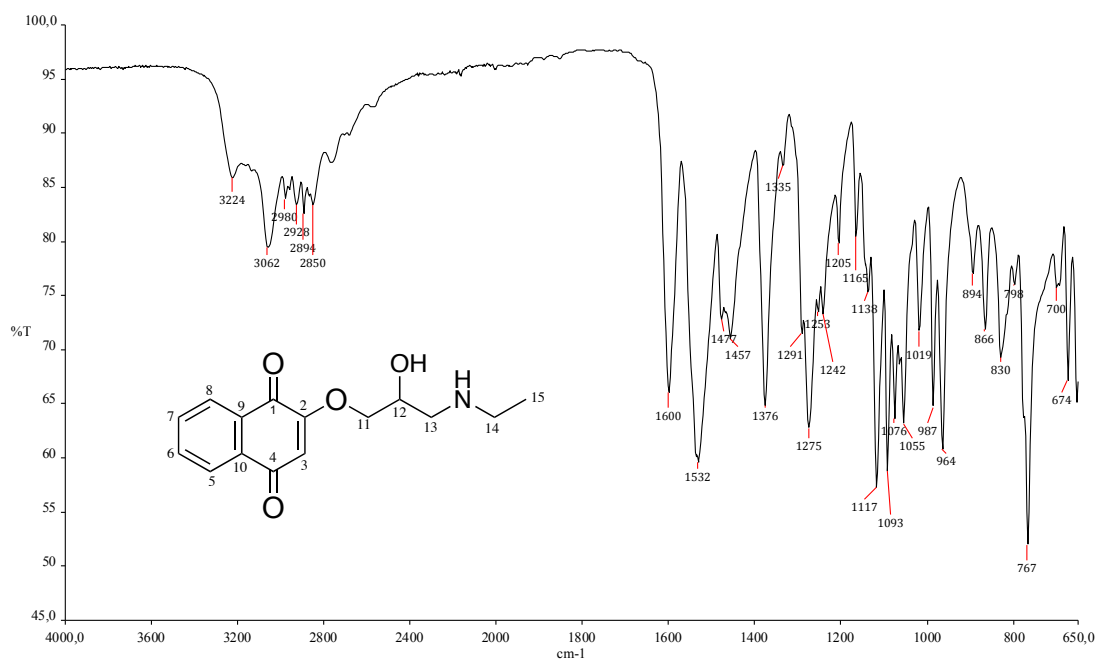

**Figure S18:** IR (ATR) spectrum of 2-(3-(ethylamino)-2-hydroxypropoxy)naphthalene-1,4-dione (**10a**).

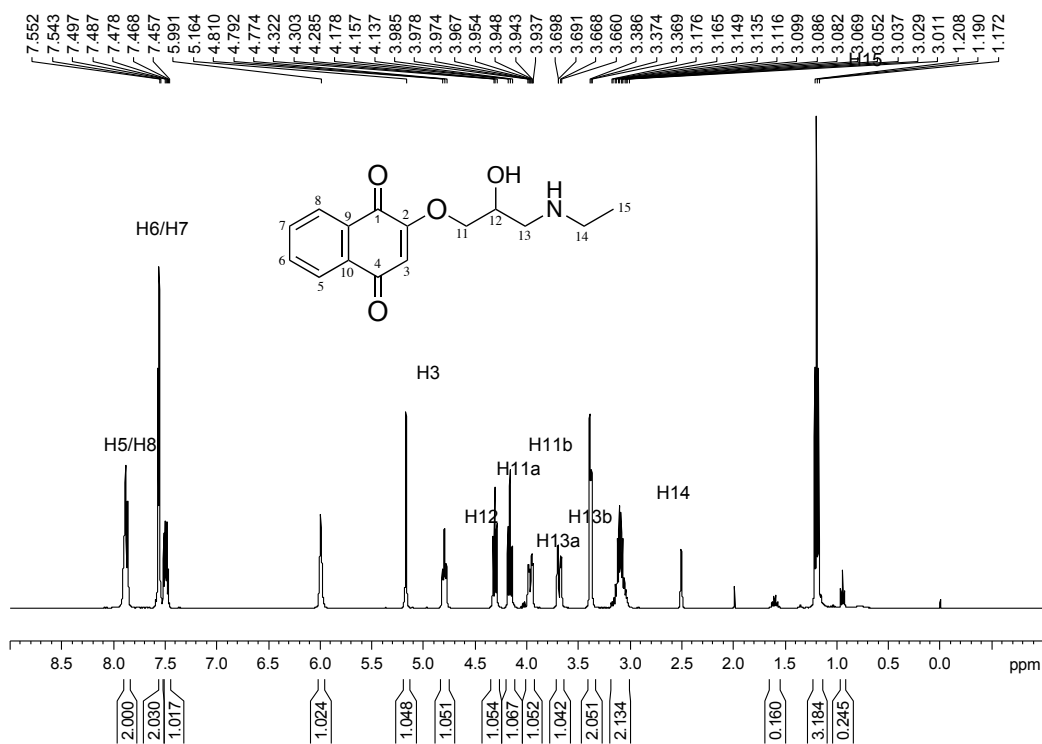

**Figure S19:**  $^1\text{H}$  NMR spectrum (400 MHz, DMSOd6) of 2-(3-(ethylamino)-2-hydroxypropoxy)naphthalene-1,4-dione (**10a**).

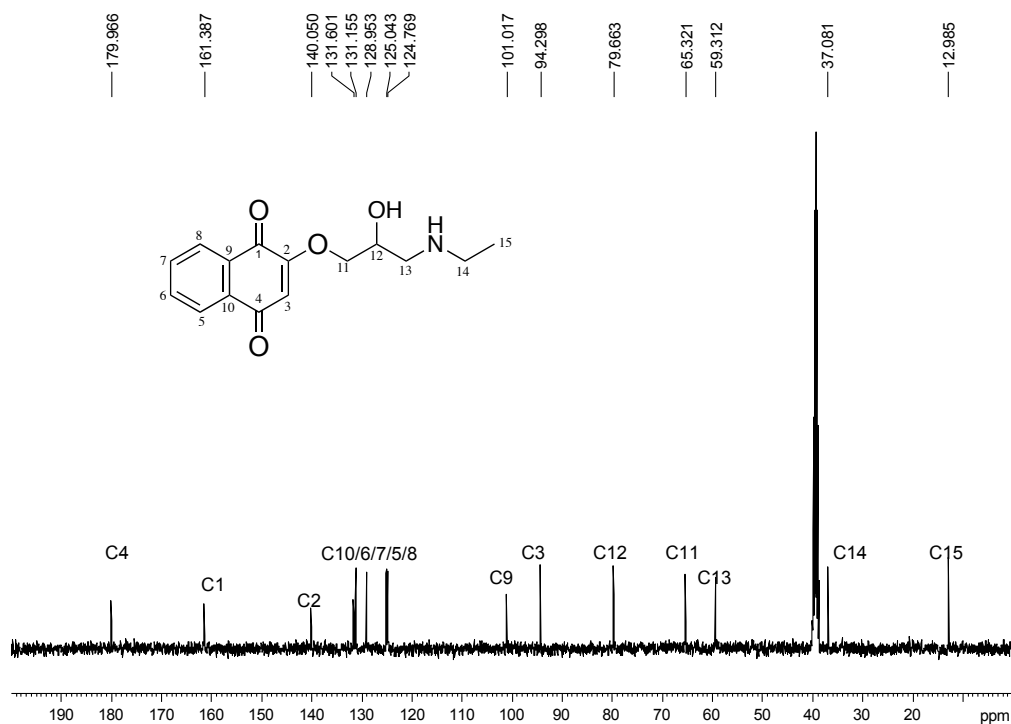

**Figure S20:**  $^{13}\text{C}$  NMR spectrum (100 MHz, DMSO- $d_6$ ) and DEPT 135 of 2-(3-(ethylamino)-2-hydroxypropoxy)naphthalene-1,4-dione (**10a**).

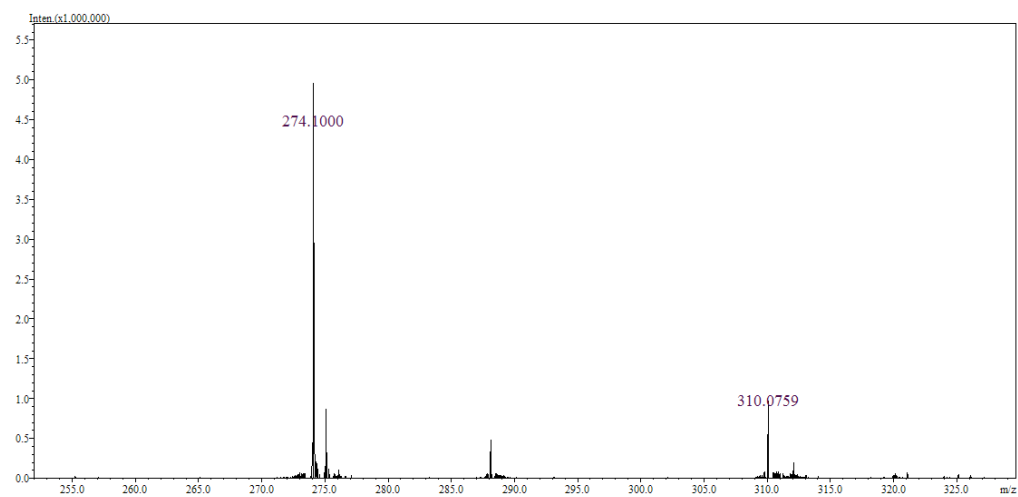

**Figure S21:** HRMS spectrum of 2-(3-(ethylamino)-2-hydroxypropoxy)naphthalene-1,4-dione (**10a**).

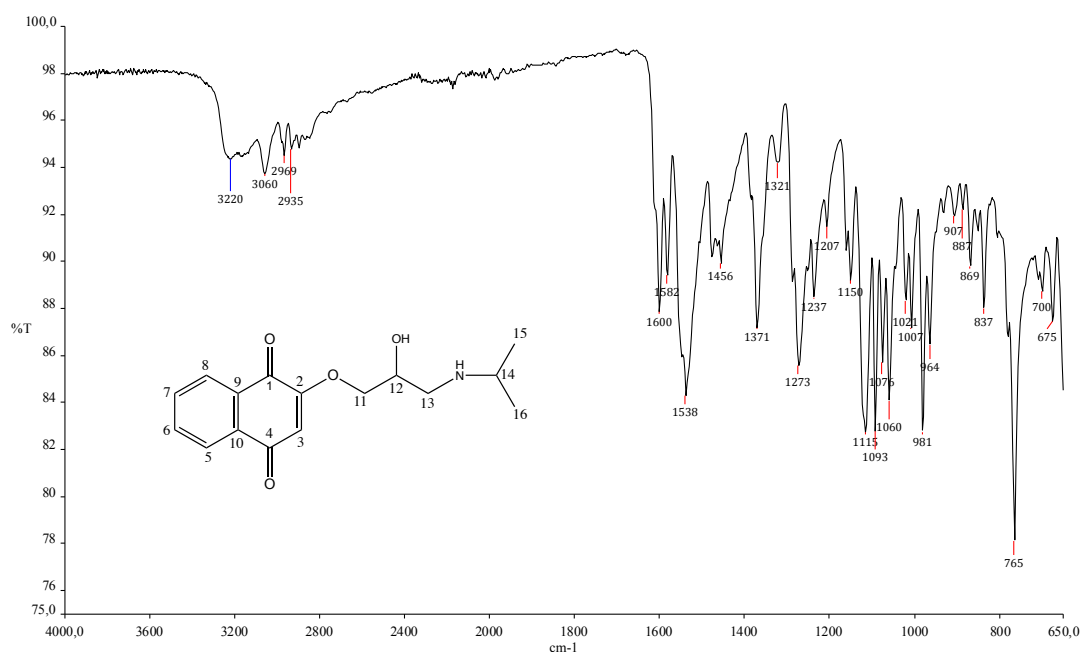

**Figure 22:** IR (ATR) spectrum of 2-(2-hydroxy-3-(isopropylamino)propoxy)naphthalene-1,4-dione (**10b**).

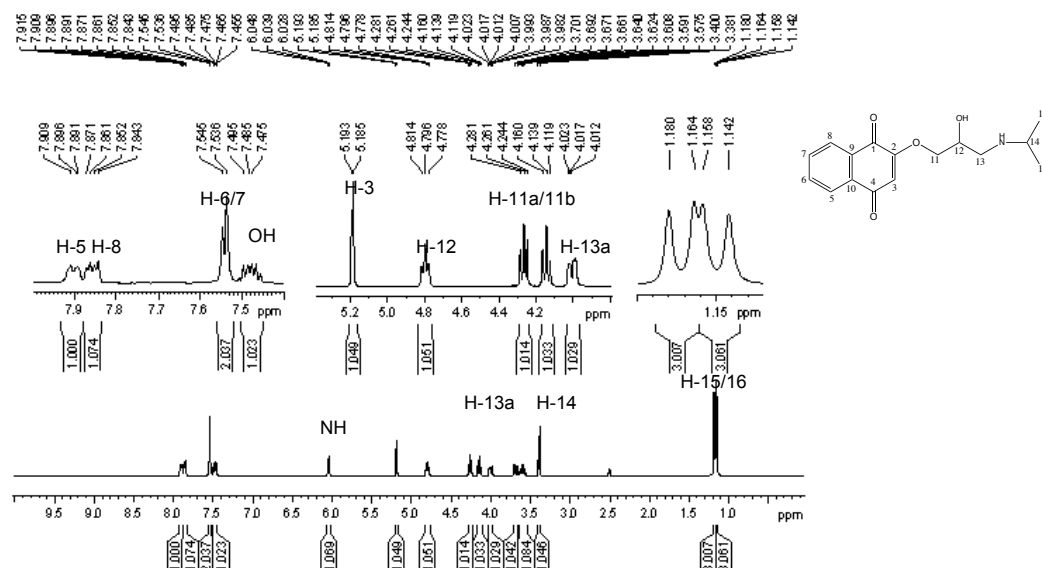

**Figure S23:**  $^1\text{H}$  NMR spectrum (400 MHz, DMSOd<sub>6</sub>) of 2-(2-hydroxy-3-(isopropylamino)propoxy)naphthalene-1,4-dione (**10b**).



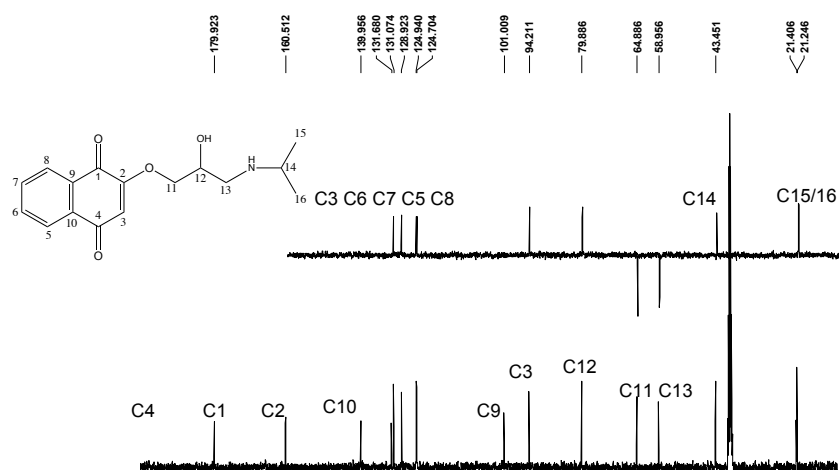

**Figure S24:**  $^{13}\text{C}$  NMR spectrum (100 MHz, DMSO-d<sub>6</sub>) and DEPT 135 of 2-(2-hydroxy-3-(isopropylamino)propoxy)naphthalene-1,4-dione (**10b**).

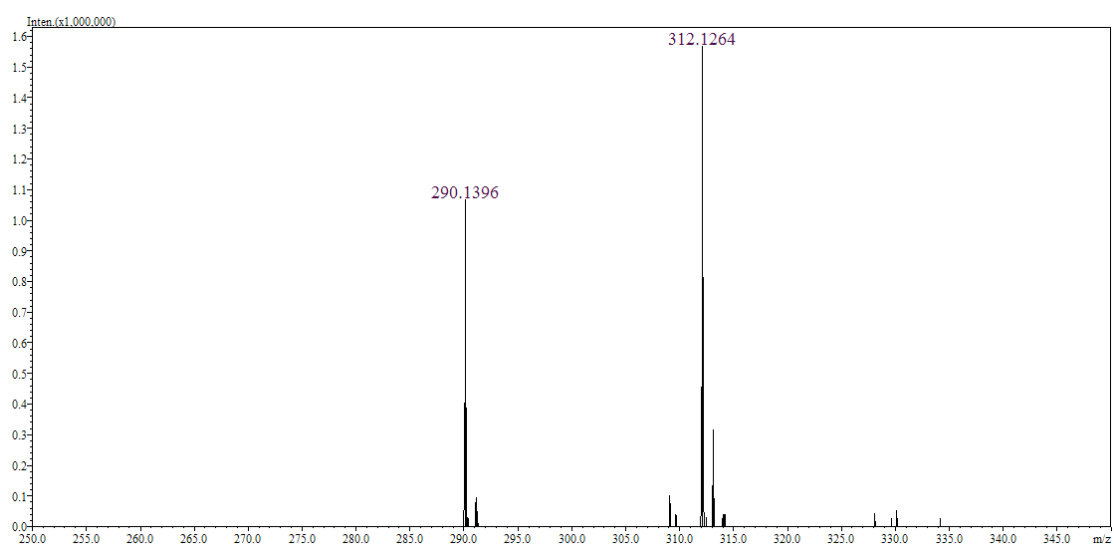

**Figure S25:** HRMS spectrum of 2-(2-hydroxy-3-(isopropylamino)propoxy)naphthalene-1,4-dione (**10b**).

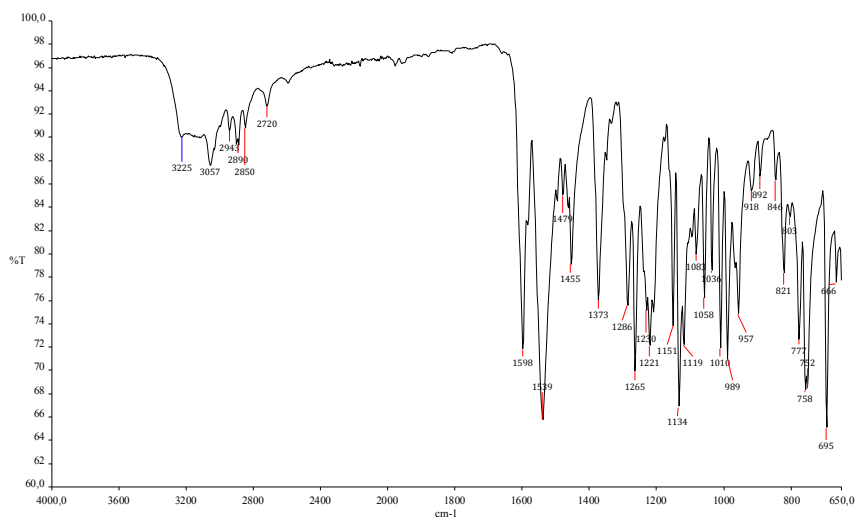

**Figure S26:** IR (ATR) spectrum of 2-(3-(benzylamino)-2-hydroxypropoxy)naphthalene-1,4-dione (**10c**).

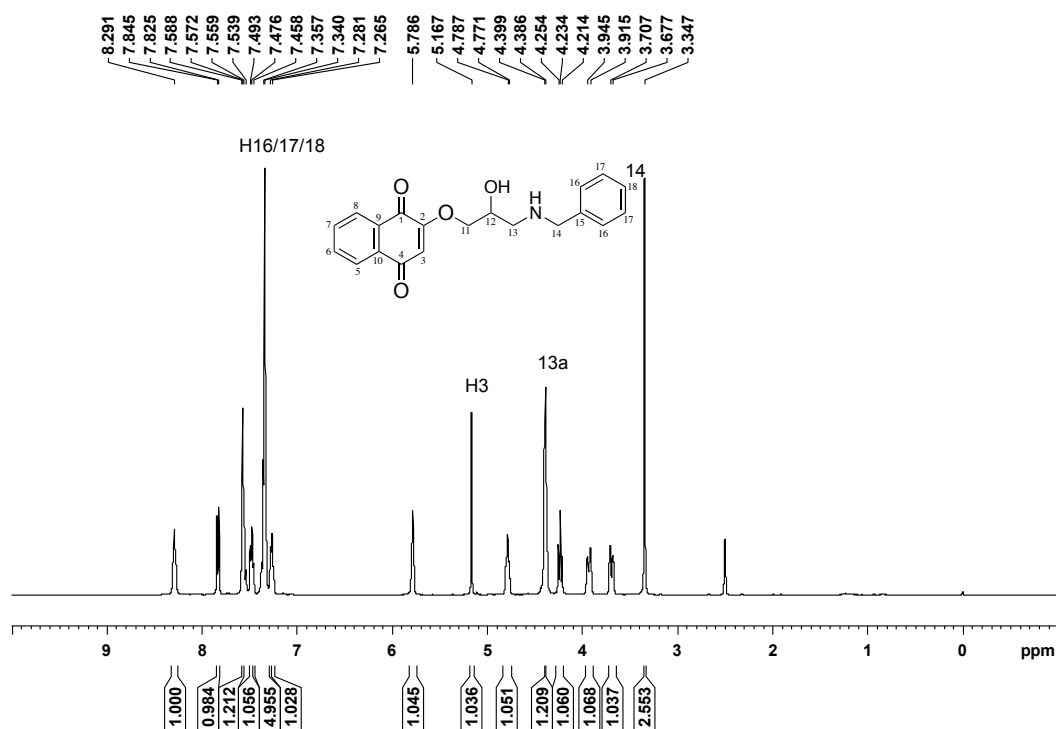

**Figure S27:**  $^1\text{H}$  NMR spectrum (400 MHz,  $\text{DMSO-d}_6$ ) of 2-(3-(benzylamino)-2-hydroxypropoxy)naphthalene-1,4-dione (**10c**).

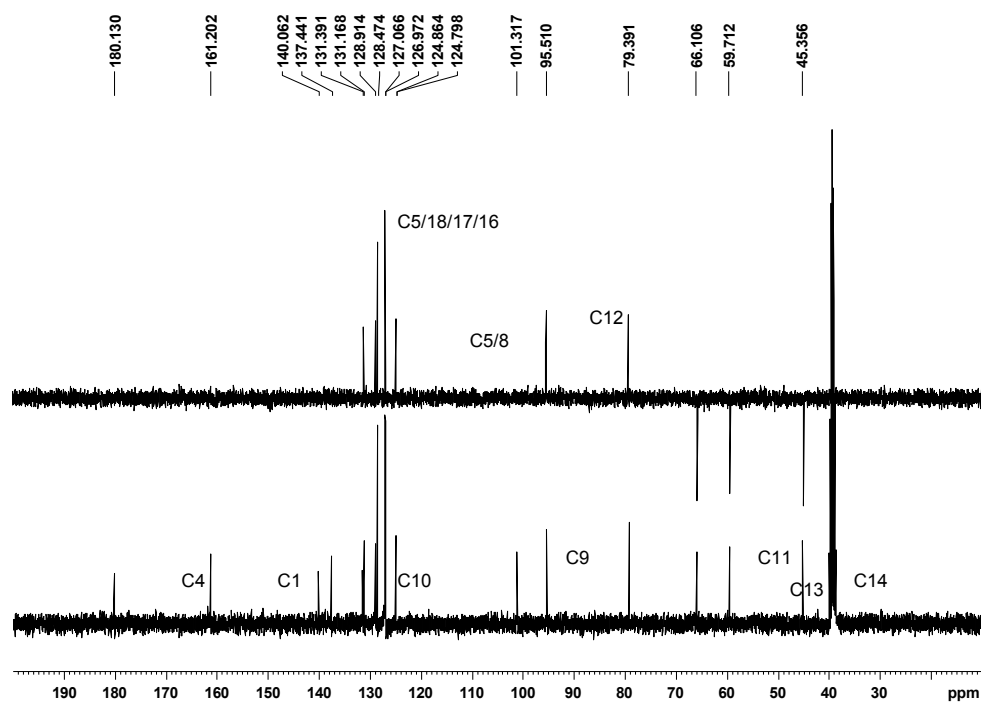

**Figure S28:**  $^{13}\text{C}$  NMR spectrum (100 MHz, DMSO  $d_6$ ) and DEPT 135 of 2-(3-(benzylamino)-2-hydroxypropoxy)naphthalene-1,4-dione (**10c**).

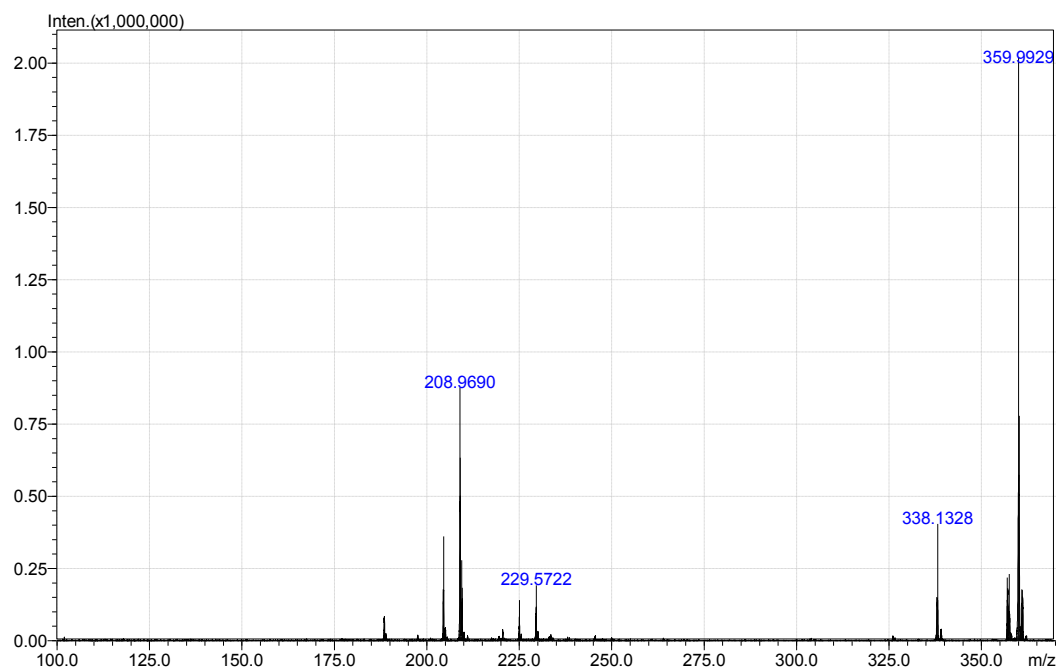

**Figure S29:** HRMS spectrum of 2-(3-(benzylamino)-2-hydroxypropoxy)naphthalene-1,4-dione (**10c**).
